# Supplementary material for: Nickel cobaltite/multi-walled carbon nanotube flexible sensor for the electrochemical detection of dopamine released by human neural cells
Source: Royal Society of Chemistry journal article supplement (doi:10.1039/d1tc05400g), 2022-01-01
Supplement: d1tc05400g1.pdf [file d1tc05400g1.pdf]

# Nickel Cobaltite/Multi-walled Carbon Nanotube Flexible Sensor for the Electrochemical Detection of Dopamine Released by Human Neural Cells

*Rasha Rahman Poolakkandy<sup>†</sup>, Neelakandan Annamalai Ramalakshmi<sup>§</sup>, Muhammed Fasil Puthiyaparambath<sup>‡</sup>, Rajanikant Golgodu Krishnamurthy<sup>§</sup>, Raghu Chathanathi<sup>‡</sup>, and Mini Mol Menamparambath<sup>†,\*</sup>*

<sup>†</sup> Department of Chemistry, National Institute of Technology Calicut, Calicut-673601, Kerala, India

<sup>§</sup> School of Biotechnology, National Institute of Technology Calicut, Calicut-673601, Kerala, India

<sup>‡</sup> Department of Physics, National Institute of Technology Calicut, Calicut-673601, Kerala, India

## ***Chemicals and reagents***

Nickel (II) chloride (Alfa Aesar, B22085, 98%), cobalt (II) chloride (Fisher Scientific, 22643, 97%), urea (Fisher Scientific, 20885, 99%), n-butanol (Fisher Scientific, 71-36-3), multiwalled carbon nanotube (4-6 nm diameter and 5-20  $\mu$ m length, TMC 220-05), Hydroxypropyl methyl cellulose (Himedia, 9004-65-3), dopamine hydrochloride (Sigma-Aldrich, 62-31-7, 98%), L-ascorbic acid (Sigma-Aldrich, 50-81-7, 99%), uric acid (Alfa Aesar, A13346, 99%), nafion D-520 dispersion (Alfa Aesar, 42118), L-Dopa (Sigma-Aldrich, D9628), ethanol (Changshu Hongsheng Fine Chemical Co. Ltd., Analytical reagent grade), polyimide heat resistant adhesive tape (Kapton 50mm), copper foil tape (Electomania), pyrolytic graphite sheet (Intelligent materials Pvt. Ltd., 7440-44-0), conductive silver paste (Techinstro, Silverpaste-001) were used as procured. SH-SY5Y cells were procured from National Centre for Cell

Science, Pune) and were maintained in DMEM/F12 (Thermo Fisher Scientific, MA, USA) containing 10% fetal bovine serum (FBS; Thermo Fisher Scientific, MA, USA) and 1% penicillin-streptomycin (Thermo Fisher Scientific, MA, USA). All chemicals required for artificial sweat preparation was procured from Sigma-Aldrich. Deionized (DI) water ( $> 18 \text{ M}\Omega$ ) was used all through the synthesis. 0.1 molar phosphate buffer solution of pH 7.2 was used for the electrochemical studies.

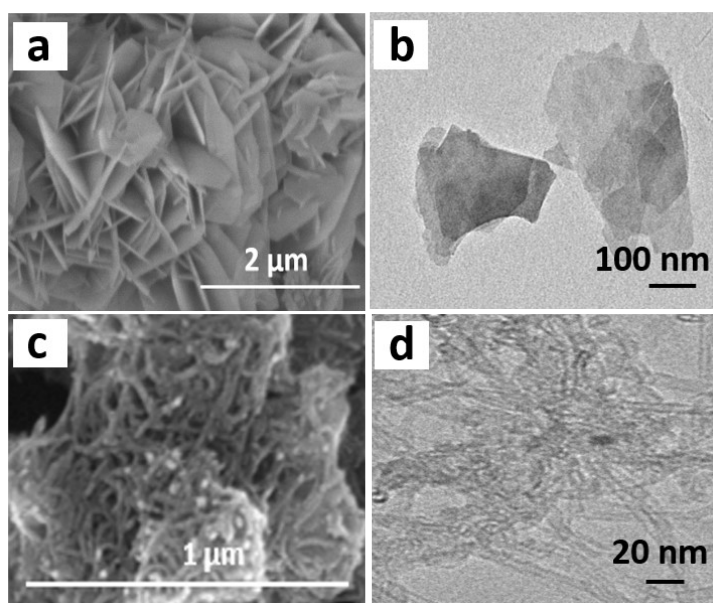

**Supporting figure S1.** (a) FESEM and (b) HRTEM of individual NC nanoflakes and (c) FESEM and (d) HRTEM of MWCNT dispersed using HPMC solution.

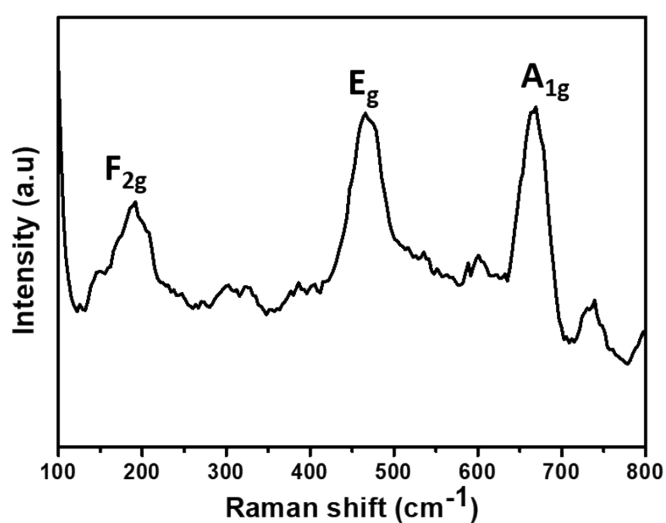

**Supporting figure S2.** Raman spectra of NC. The major peaks obtained at 187, 472 and 670  $\text{cm}^{-1}$  corresponds to the F<sub>2g</sub>, E<sub>g</sub> and A<sub>1g</sub> modes of NC.<sup>1,2</sup>

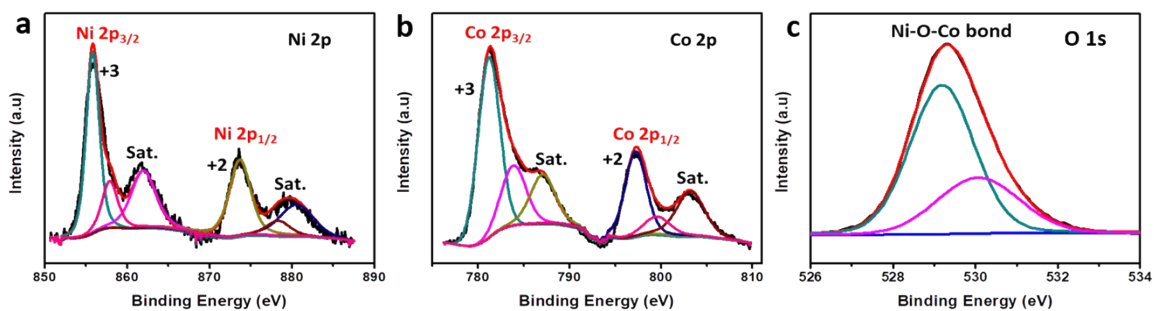

**Supporting figure S3.** Deconvoluted XPS spectra of (a) Ni (b) Co and (c) O of NC

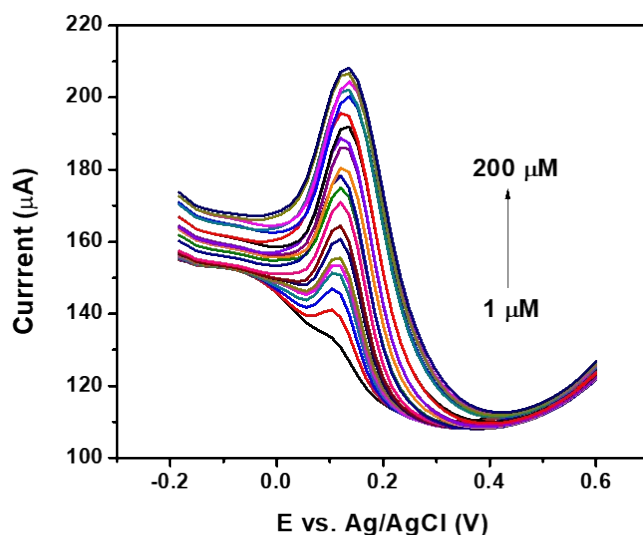

**Supporting figure S4.** DPV plots of NC/MWCNT modified GCE towards varying concentrations of DA.

| Sl No. | Electrode                               | Linear range ( $\mu\text{M}$ ) | LOD ( $\mu\text{M}$ ) | Real Sample                   | Reference |
|--------|-----------------------------------------|--------------------------------|-----------------------|-------------------------------|-----------|
| 1      | CAuNE                                   | 1 – 100                        | 5.83                  | Neural cells                  | S3        |
| 2      | CuTRZMoO <sub>4</sub> @ppy-2            | 1 – 100                        | 0.080                 | Serum                         | S4        |
| 3      | Au-SiO <sub>2</sub> /GCE                | 1 – 100<br>100 – 500           | 1.98                  | Serum                         | S5        |
| 4      | OM-ZnFe <sub>2</sub> O <sub>4</sub> -40 | 0.002 – 0.6                    | 0.0004                | PC12 cells                    | S6        |
| 5      | DAP-ERGO/MoO <sub>3</sub>               | 0.1 – 900                      | 0.025                 | Urine                         | S7        |
| 6      | Pt-Ni/rGO                               | 0.01 – 100                     | 0.0026                | Serum,<br>pharmaceutical drug | S8        |

|    |            |         |       |                                                |           |
|----|------------|---------|-------|------------------------------------------------|-----------|
| 7  | Pd-NP/RGO  | 1 - 150 | 0.233 | Injection                                      | S9        |
| 8  | ZnO NSB/GF | 1 - 180 | 0.01  | Urine                                          | S10       |
| 9  | SPCE/CQD   | 1 - 7   | 0.099 | Urine                                          | S11       |
| 10 | NC/MWCNT   | 1 - 200 | 0.080 | Neural cells,<br>artificial<br>sweat,<br>serum | This work |

**Supporting table S1.** Comparison of linear range, LOD and the real sample analysis of the proposed sensor with the literature.

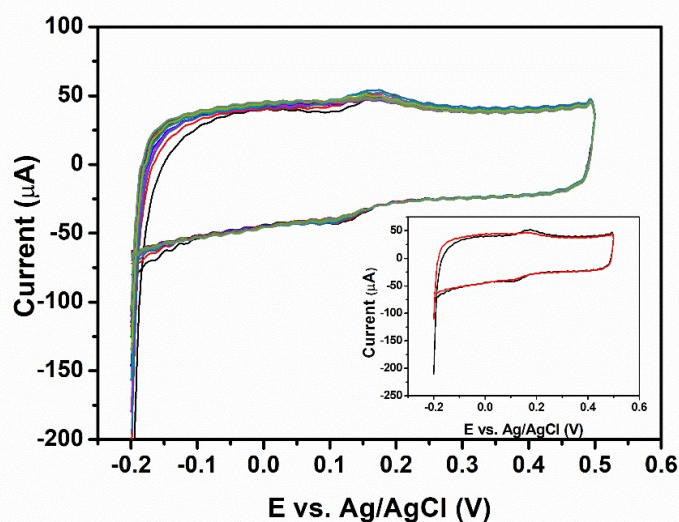

**Supporting figure S5.** Successive CV plots of NC/MWCNT modified electrodes in 100 μM DA solution. Inset showing the CV plot for the first and 20<sup>th</sup> cycle. The anodic peak current of first cycle is 51.9 μA and the anodic peak current after 20 cycles is 47.7 μA.

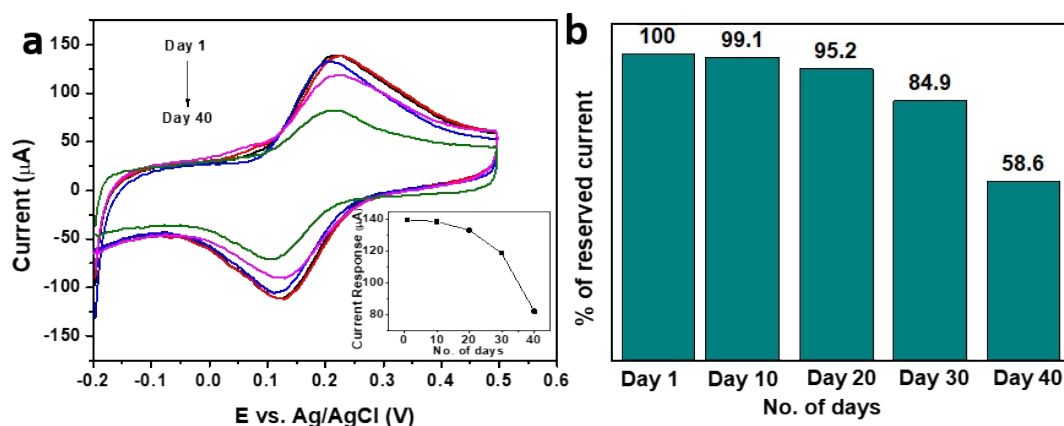

**Supporting figure S6.** Storage stability studies of NC/MWCNT modified electrode. (a) CV plots of NC/MWCNT modified electrode towards 1 mM DA taken periodically from day 1 to day 40. The inset showing the depletion in the anodic current with the number of days. (b) % of current reserved from day 1 to 40.

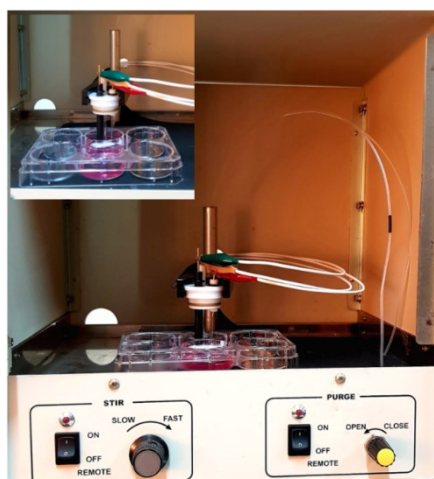

**Supporting figure S7.** Photograph of the amperometric detection setup for the detection of DA released by SH-SY5Y neural cells.

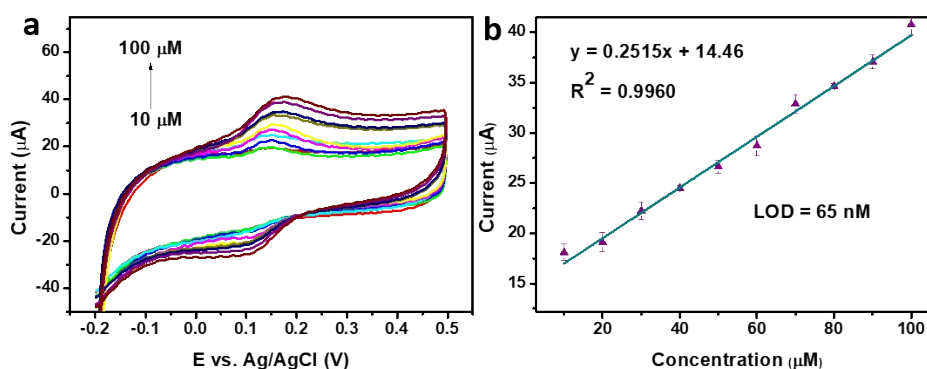

**Supporting figure S8.** (a) CV plots of NC/MWCNT modified GCE at different concentrations of DA from 10-100  $\mu\text{M}$  in artificial sweat sample (b) The calibration plot of current response vs. concentration of DA.

| Sl No. | Added | Output | Output | Recovery | % | RSD |
|--------|-------|--------|--------|----------|---|-----|
|--------|-------|--------|--------|----------|---|-----|

|    | concentration (μM) | current in std. solution (μA) | current in sweat solution (μA) | concentration (μM) | Recovery | (%)  |
|----|--------------------|-------------------------------|--------------------------------|--------------------|----------|------|
| 1  | 10                 | 16.1                          | 18.78                          | 13.27              | 132.7    | 0.82 |
| 2  | 20                 | 18.9                          | 19.11                          | 22.5               | 112.5    | 0.95 |
| 3  | 30                 | 21.15                         | 22.23                          | 32.86              | 109.53   | 0.86 |
| 4  | 40                 | 23.43                         | 24.51                          | 40.51              | 101.27   | 0.22 |
| 5  | 50                 | 25.46                         | 26.63                          | 49.31              | 98.62    | 0.67 |
| 6  | 60                 | 28.2                          | 28.71                          | 58.06              | 96.76    | 0.96 |
| 7  | 70                 | 31.2                          | 32.89                          | 70.80              | 101.14   | 0.91 |
| 8  | 80                 | 33.67                         | 34.65                          | 78.25              | 97.81    | 0.25 |
| 9  | 90                 | 36.3                          | 37.07                          | 87.95              | 97.72    | 0.72 |
| 10 | 100                | 39.1                          | 40.78                          | 100.5              | 100.5    | 0.98 |

**Supporting table S2.** Recovery results of DA in artificial sweat

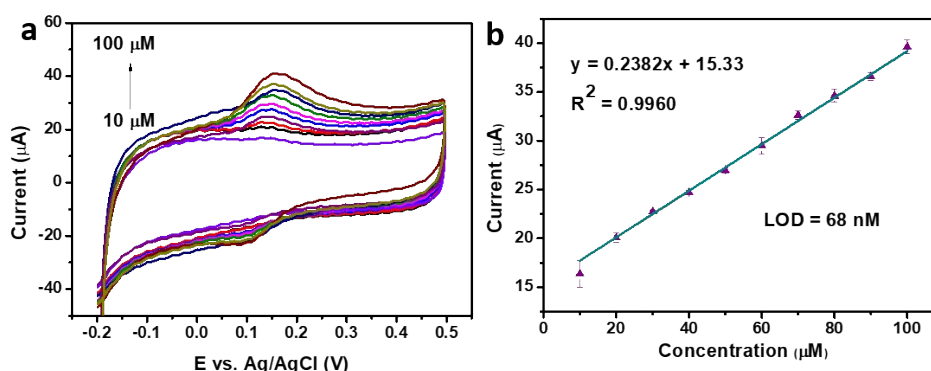

**Supporting figure S9.** (a) CV plots of NC/MWCNT modified GCE at different concentrations of DA from 10-100 μM in human serum sample (b) The calibration plot of current response vs. concentration of DA.

| Sl No. | Added concentration (μM) | Output current in std. solution (μA) | Output current in sweat solution (μA) | Recovery concentration (μM) | % Recovery | RSD (%) |
|--------|--------------------------|--------------------------------------|---------------------------------------|-----------------------------|------------|---------|
| 1      | 10                       | 16.1                                 | 16.34                                 | 11.27                       | 112.7      | 0.82    |
| 2      | 20                       | 18.9                                 | 20.06                                 | 22.5                        | 112.5      | 0.95    |
| 3      | 30                       | 21.15                                | 22.74                                 | 32.86                       | 109.53     | 0.86    |
| 4      | 40                       | 23.43                                | 24.71                                 | 40.51                       | 101.27     | 0.22    |
| 5      | 50                       | 25.46                                | 26.67                                 | 49.31                       | 98.62      | 0.67    |
| 6      | 60                       | 28.2                                 | 29.49                                 | 58.06                       | 96.76      | 0.96    |
| 7      | 70                       | 31.2                                 | 32.62                                 | 70.80                       | 101.14     | 0.91    |
| 8      | 80                       | 33.67                                | 34.61                                 | 78.25                       | 97.81      | 0.25    |

|    |     |      |       |       |       |      |
|----|-----|------|-------|-------|-------|------|
| 9  | 90  | 36.3 | 36.56 | 87.95 | 97.72 | 0.72 |
| 10 | 100 | 39.1 | 40.54 | 100.5 | 100.5 | 0.98 |

**Supporting table S3.** Recovery results of DA in human serum sample

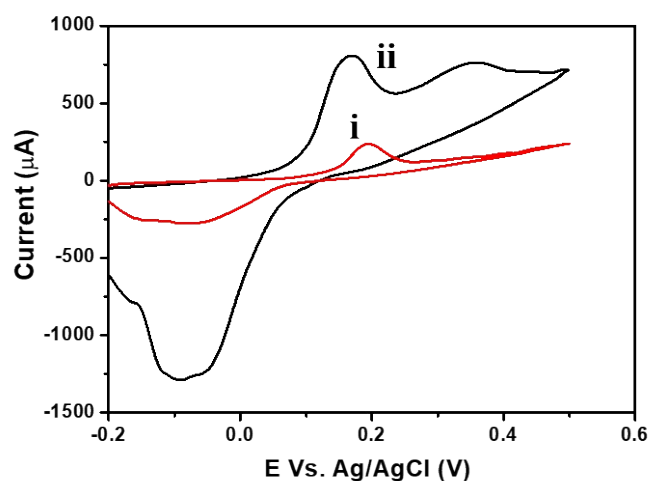

**Supporting figure S10.** CV response of the all-integrated sensor towards the (i) buffer solution and (ii) 100 nM DA.

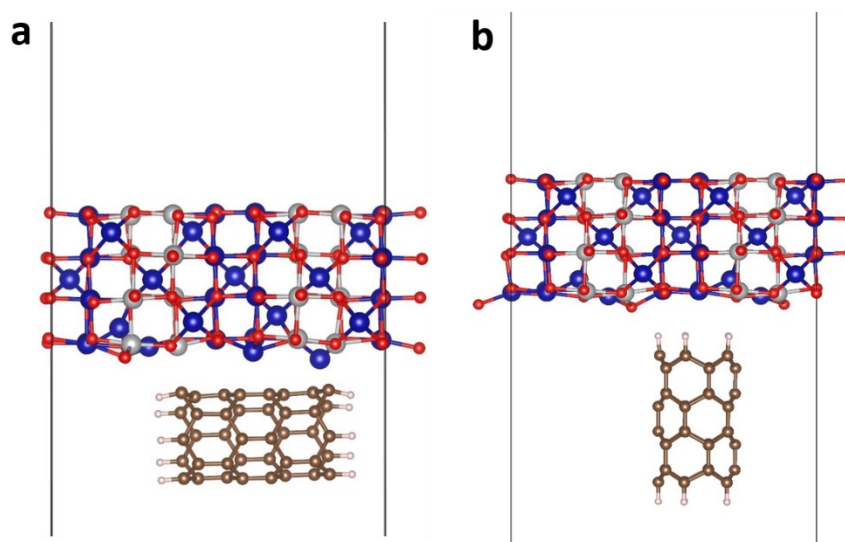

**Supporting figure S11.** The two initial configurations for the co-adsorption of passivated MWCNT below NC sheets.

## References

- 1 D. Zhang, H. Yan, Y. Lu, K. Qiu, C. Wang, C. Tang, Y. Zhang, C. Cheng and Y. Luo, *Nanoscale Res. Lett.*, 2014, **9**, 1–9.

- 2 K. J. Kim and T. Y. Koh, *J. Sol-Gel Sci. Technol.*, 2016, **77**, 528–533.
- 3 D. S. Kim, E. S. Kang, S. Baek, S. S. Choo, Y. H. Chung, D. Lee, J. Min and T. H. Kim, *Sci. Rep.*, 2018, **8**, 1–10.
- 4 K. Zhou, D. Shen, X. Li, Y. Chen, L. Hou, Y. Zhang and J. Sha, *Talanta*, 2020, **209**, 120507.
- 5 S. Immanuel, T. K. Aparna and R. Sivasubramanian, *Surfaces and Interfaces*, 2019, **14**, 82–91.
- 6 Y. Huang, Y. Tang, S. Xu, M. Feng, Y. Yu, W. Yang and H. Li, *Anal. Chim. Acta*, 2020, **1096**, 26–33.
- 7 N. Roy, S. Yasmin and S. Jeon, *Microchem. J.*, 2020, **153**, 104501.
- 8 Y. Veera Manohara Reddy, B. Sravani, H. Maseed, T. Łuczak, M. Osińska, L. Subramanyamsarma, V. V. S. S. Srikanth and G. Madhavi, *New J. Chem.*, 2018, **42**, 16891–16901.
- 9 S. Palanisamy, S. Ku and S. M. Chen, *Microchim. Acta*, 2013, **180**, 1037–1042.
- 10 S. Huang, S. Song, H. Yue, X. Gao, B. Wang and E. Guo, *Sensors Actuators, B Chem.*, 2018, **277**, 381–387.
- 11 N. R. Devi, T. H. V. Kumar and A. K. Sundramoorthy, *J. Electrochem. Soc.*, 2018, **165**, G3112–G3119.
